# Supplementary material for: The cinematic nature of the opening scene of Heliodoros' "Aithiopika"
Source: eLife journal article supplement (doi:10.7554/elife.11794), 2000-01-01
Supplement: figures [file elife-11794-figures-v2.pdf]

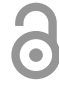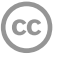

---

## Figures and figure supplements

The Rqc2/Tae2 subunit of the ribosome-associated quality control (RQC) complex marks ribosome-stalled nascent polypeptide chains for aggregation

**Ryo Yonashiro *et al***

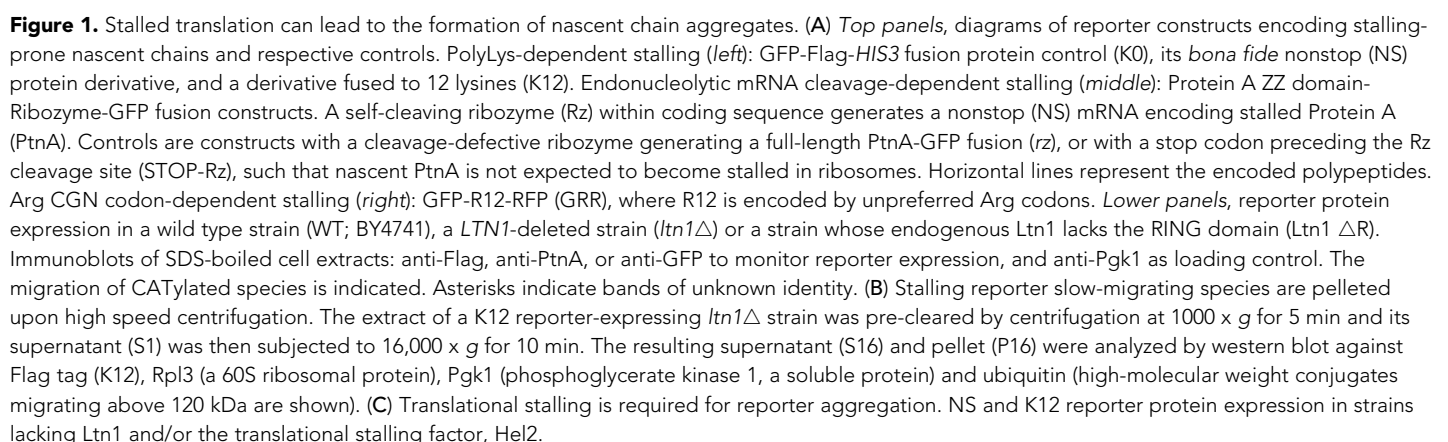

Yonashiro et al. eLife 2016;5:e11794. DOI: 10.7554/eLife.11794

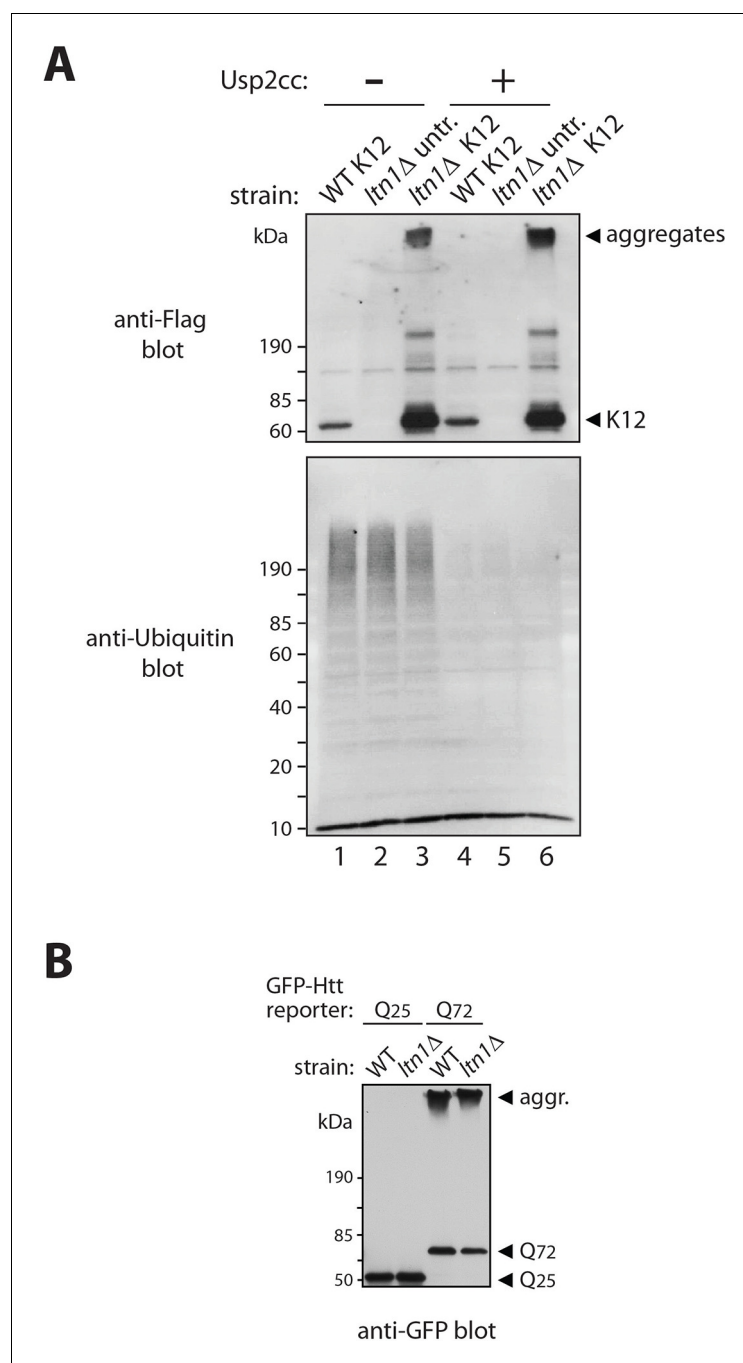

**Figure 1—figure supplement 1.** Stalled translation can lead to the formation of nascent chain aggregates. **(A)** The slow migration of stalling reporters expressed in *ltn1Δ* cells is not due to poly-ubiquitylation. Strains utilized were wild type (WT), *ltn1Δ* cells, and *ltn1Δ* cells expressing the K12 reporter. Cell extracts were treated with the recombinant catalytic core of Usp2 (Usp2cc), which has general deubiquitylase activity, for 1h at room temperature, as described (Kaiser et al., 2011). The anti-Flag blot shows a lack of effect of Usp2cc on the migration of high molecular weight stalling reporter species (compare lanes 3 and 6) while the anti-ubiquitin blot confirms that the enzyme was able to efficiently disassemble ubiquitin chains linked to proteins in the extract. **(B)** Loss of *LTN1* is not generally associated with increased formation of protein aggregates. Expression of GFP-Huntingtin exon 1 polyglutamine reporters (Htt-Q25 and Htt-Q72) in WT and *ltn1Δ* strain extracts revealed by anti-GFP immunoblot.

DOI: [10.7554/eLife.11794.004](https://doi.org/10.7554/eLife.11794.004)

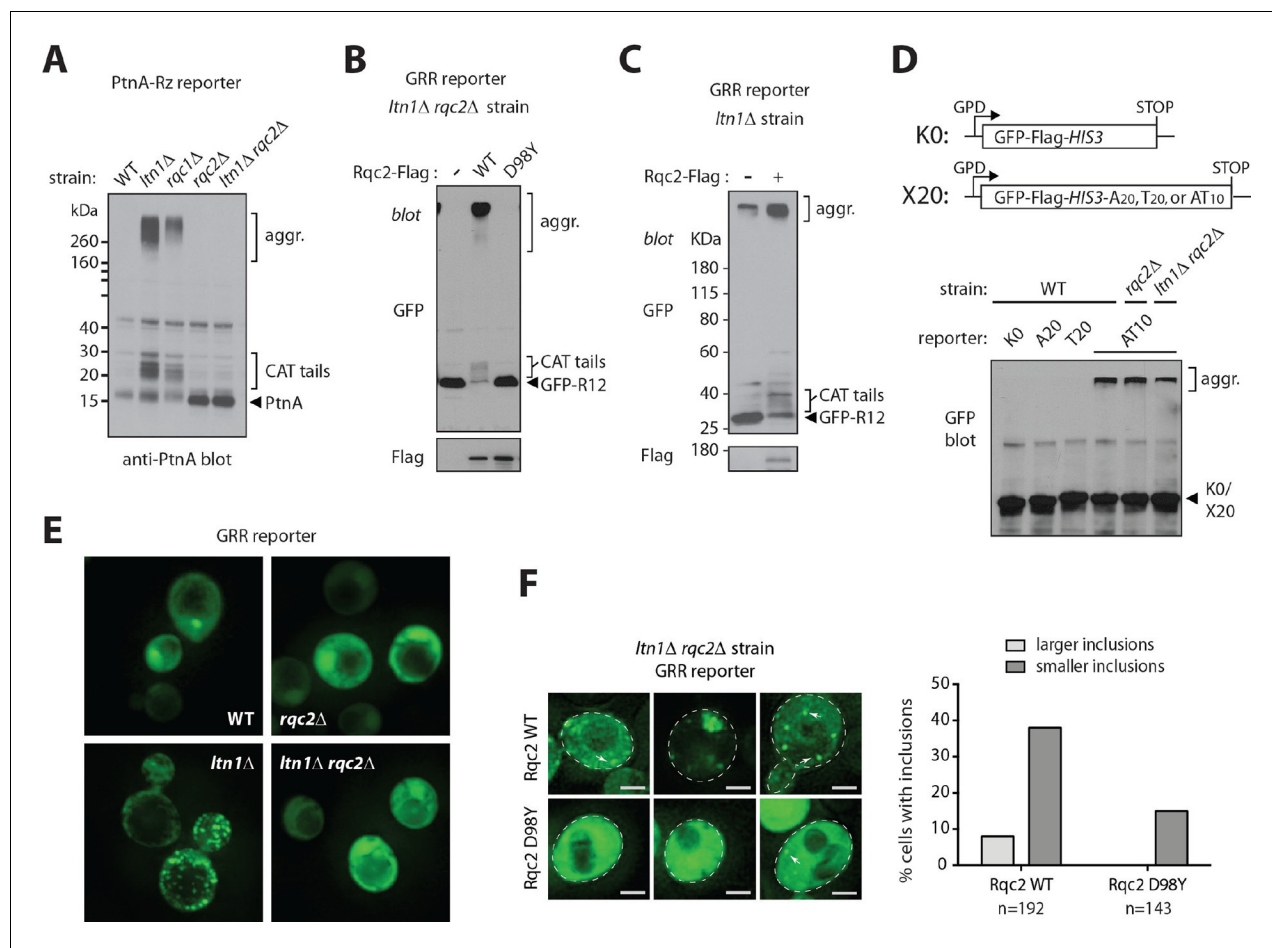

**Figure 2.** Rqc2-mediated modification of stalled nascent chains with CAT tails results in their aggregation. (A) NC CATylation correlates with aggregation—effects of *RQC1* and *RQC2* deletion. The indicated strains were transformed with the PtnA NS-Rz reporter. Reporter expression was monitored by immunoblot anti-PtnA. The migration of CATylated species is indicated. (B) An Rqc2 mutant defective in CAT tail synthesis fails to promote aggregation of stalled NCs. The *ltn1Δ rqc2Δ* strain expressing the GRR reporter was transformed with plasmids encoding Rqc2-Flag wild type (WT) or D98Y mutant. (C) Endogenous Rqc2 is limiting for NC CATylation and aggregation in *ltn1Δ* cells. The *ltn1Δ* strain expressing the GRR reporter was transformed or not with plasmid encoding Rqc2-Flag wild type (WT). Reporter expression was monitored by immunoblot anti-GFP. (D) Fusion of a CAT tail-mimetic sequence to the C-terminus of the K0 reporter protein suffices to promote aggregation independently of stalling or Rqc2. Top panel, diagram of constructs. Lower panel, as in 'a'. The indicated strains were transformed with plasmids encoding the parental reporter (K0, as described in 1a) or its derivatives fused to a C-terminal tail of 20 Ala, 20 Thr, or 10 Ala-Thr repeats, as indicated. (E) Punctae formed by stalling reporters in intact cells correlate with aggregates observed in WCE. Fluorescence microscopy imaging of indicated strains expressing the GRR reporter. GFP-positive punctae can be observed in the *ltn1Δ* strain. (F) CAT tail-dependent incorporation of the GRR stalling reporter into punctae. Left, The *ltn1Δ rqc2Δ* strain was transformed with plasmids encoding Rqc2-Flag wild type (WT) or D98Y mutant as in panel 'B' and examined by fluorescence microscopy. Three different distribution patterns of the GFP signal that are representative for each strain are shown. Arrows point to selected punctae. Scale bar, 2  $\mu$ m. Right, Quantification of cells harboring GFP-positive inclusions in the *ltn1Δ rqc2Δ* strains expressing Rqc2 WT or D98Y mutant.

DOI: [10.7554/eLife.11794.005](https://doi.org/10.7554/eLife.11794.005)

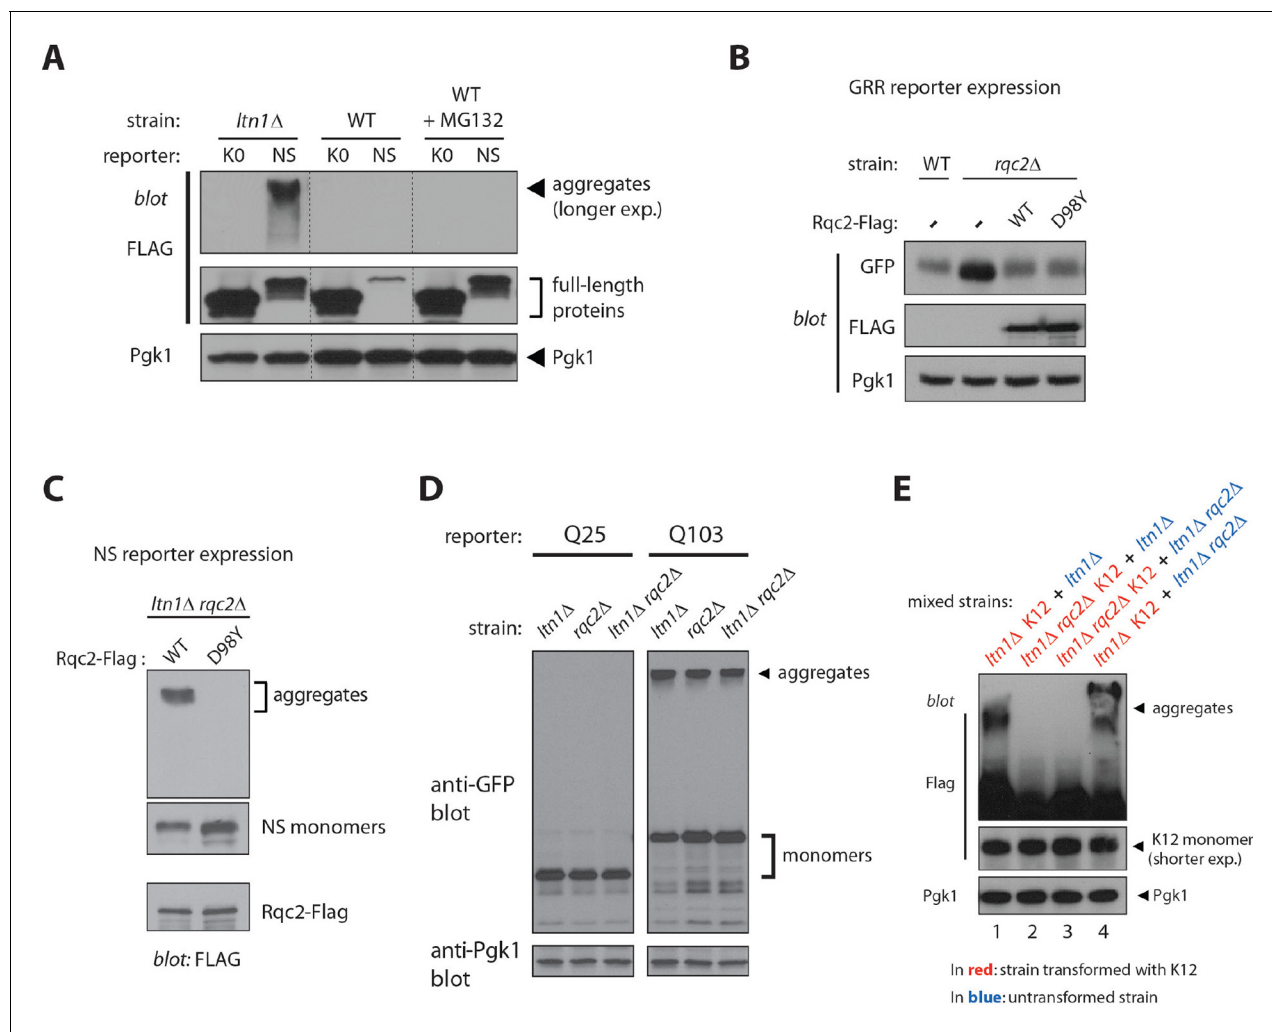

**Figure 2—figure supplement 1.** Rqc2-mediated modification of stalled nascent chains with CAT tails results in their aggregation. (A) Accumulation of stalling reporters by proteasome inhibition is not sufficient to result in aggregation. Immunoblot analysis of K0 and NS reporter expression in wild type or *ltn1Δ* strains, after treatment (+) or not (-) with the proteasome inhibitor MG132 for 2 hr. (B) The Rqc2 D98Y mutant is competent to support Ltn1 function. Stalling reporter expression in wild type or *rqc2Δ* strains transformed with empty vector, wild type Rqc2-Flag, or Rqc2-Flag D98Y. (C) CATylation is required for aggregation of the NS reporter. The *ltn1Δ rqc2Δ* strain expressing the NS reporter was transformed with plasmids encoding Rqc2-Flag wild type (WT) or D98Y mutant. Expression of NS monomers, NS aggregates, and Rqc2-Flag revealed by anti-Flag immunoblot. Panels with different exposure times shown. (D) Loss of RQC2 is not generally associated with the failure to form protein aggregates. Expression of GFP-Huntingtin exon 1 polyglutamine reporters (Htt-Q25 and Htt-Q103) in the indicated strains revealed by anti-GFP immunoblot. (E) Stalling reporter aggregates do not form post-lysis. K12 reporter-expressing strains (labeled in red) were mixed 1:1 with a second, untransformed strain (labeled in blue) before lysis, and extracts were analyzed for aggregate formation by anti-Flag immunoblot. The presence of the *ltn1Δ* strain constituents during lysis was not sufficient to promote aggregation of the K12 reporter expressed in a *ltn1Δ rqc2Δ* strain (lane 2). Conversely, the presence of constituents of the *ltn1Δ rqc2Δ* strain did not interfere with aggregates formed by K12 reporter-expressing *ltn1Δ* strain (compare lane 4 to lane 1).

DOI: 10.7554/eLife.11794.006

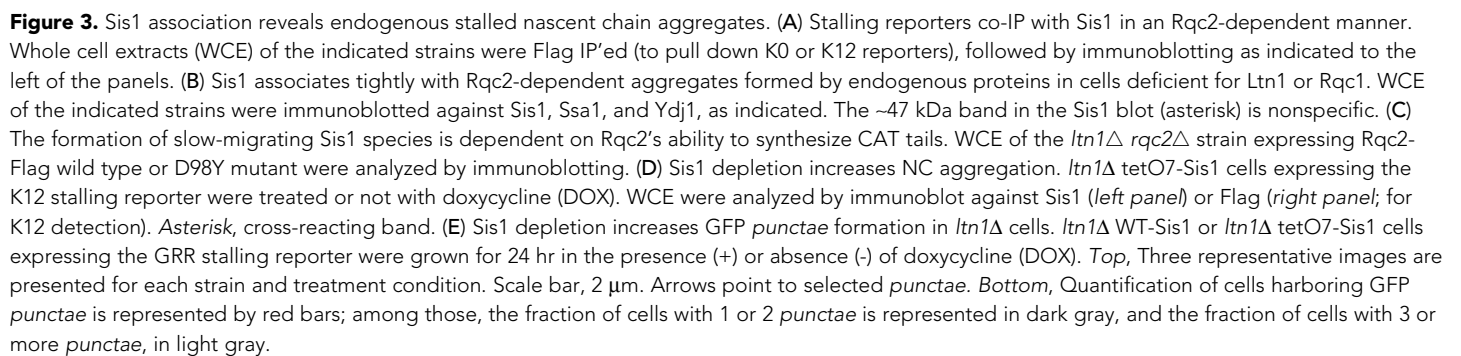

Yonashiro et al. eLife 2016;5:e11794. DOI: 10.7554/eLife.11794

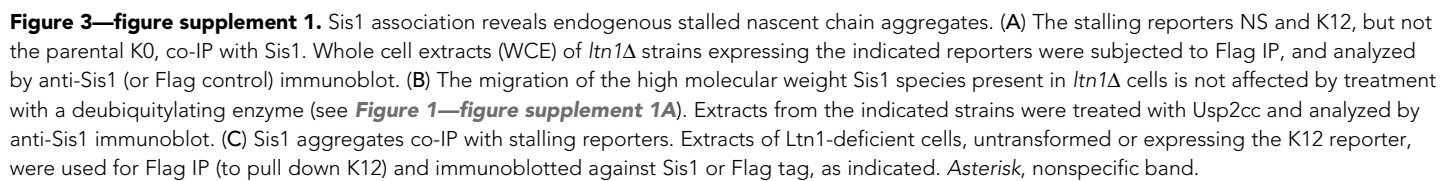

Yonashiro et al. eLife 2016;5:e11794. DOI: 10.7554/eLife.11794

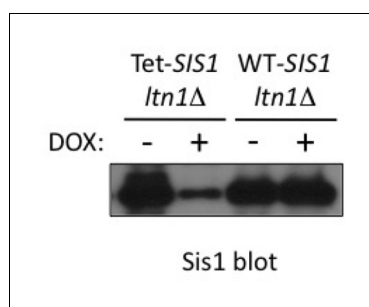

**Figure 3—figure supplement 2.** *tetO7* promoter-dependent Sis1 depletion. *ltn1Δ tetO7-SIS1* and *ltn1Δ WT-SIS1* cells were treated with doxycycline as indicated, and analyzed by western blot using antibodies against Sis1.

DOI: [10.7554/eLife.11794.009](https://doi.org/10.7554/eLife.11794.009)



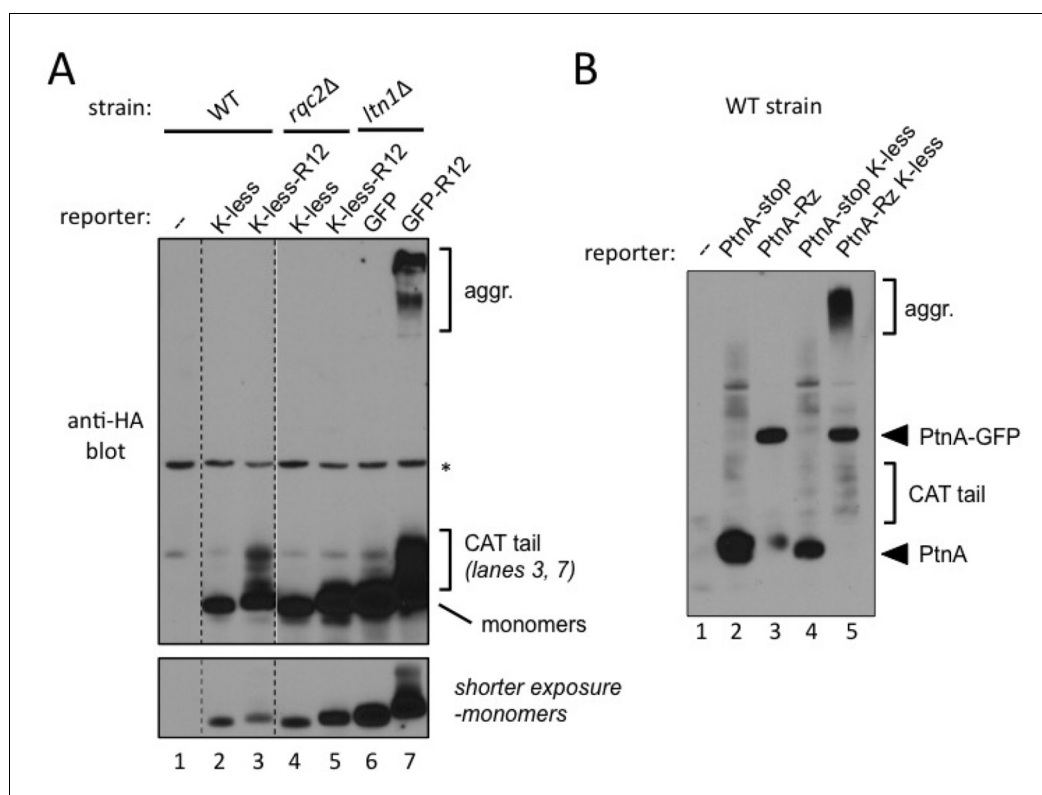

**Figure 4.** Evidence for stalled nascent chain modification with CAT tails and aggregation in wild type cells. (A) Stalling Lys-less reporter modification with CAT tails in wild type yeast. All constructs were HA-tagged. Expression of GFP, GFP-R12, GFP K-less ('K-less'), or GFP K-less R12 ('K-less-R12') reporter proteins in the indicated strains, revealed by anti-HA immunoblot. 'R12' is the stalling signal, consisting of 12 suboptimal Arg CGN codons. GFP-R12 expression in *ltn1Δ* cells is used as a control for aggregate formation. Lower panel, shorter exposure to reveal relative steady-state levels of monomeric reporter species. (B) Stalling PtnA-Rz reporter CATylation and aggregation in wild type yeast. All constructs were HA-tagged. Expression of PtnA-STOP-Rz, PtnA-Rz, PtnA-STOP-Rz K-less, and PtnA-Rz K-less reporter proteins in the wild type strain, revealed by anti-HA immunoblot.

DOI: [10.7554/eLife.11794.010](https://doi.org/10.7554/eLife.11794.010)

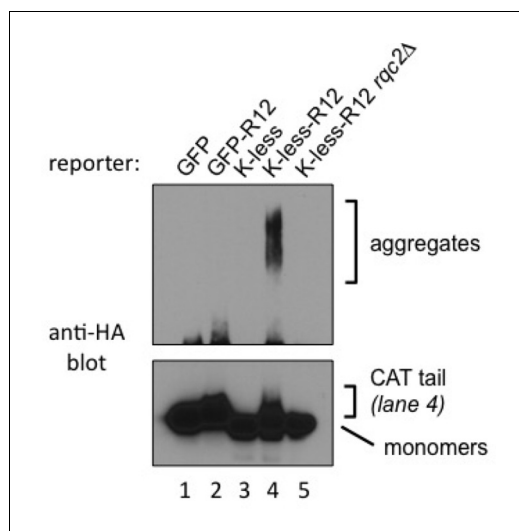

**Figure 4—figure supplement 1.** Stalling NC reporter aggregation in wild type yeast. HA-tagged GFP, GFP-R12, GFP K-less ('K-less'), or GFP K-less R12 ('K-less R12') reporters expressed in the MG132-treated wild type strain (or MG132 treated *rqc2Δ* strain as a control, lane 5) were concentrated by anti-HA IP and analyzed by anti-HA immunoblot. *Lower panel*, the monomeric forms are shown in a shorter exposure to reveal relative steady-state levels of monomeric reporter species, as well as CAT tails in lane 4.

DOI: [10.7554/eLife.11794.011](https://doi.org/10.7554/eLife.11794.011)
