# Supplementary material for: The Rqc2/Tae2 subunit of the ribosome-associated quality control (RQC) complex marks ribosome-stalled nascent polypeptide chains for aggregation
Source: eLife journal article supplement (doi:10.7554/elife.11794), 2016-03-04
Supplement: supp [file elife_poa_e11794_Supplementary_File_2.docx]

**Supplementary file 2 (Table SI). Strain genotypes.**

| Strain | Genotype | Source |
| --- | --- | --- |
| BY4741 *ltn1* | MATa: *his3*1; *leu2*0; *met15*0; *ura3*0; *ltn1*::KanMX6 | Thermo Scientific |
| BY4741 *hel2* | MATa: *his3*1; *leu2*0; *met15*0; *ura3*0; *hel2*::KanMX6 | Thermo Scientific |
| BY4741 *rqc2* | MATa: *his3*1; *leu2*0; *met15*0; *ura3*0; *rqc2*::KanMX6 | Thermo Scientific |
| BY4741 *rqc1* | MATa: *his3*1; *leu2*0; *met15*0; *ura3*0; *rqc1*::KanMX6 | Thermo Scientific |
| BY4741 *ltn1**hel2* | MATa: *his3*1; *leu2*0; *met15*0; *ura3*0; *hel2*::KanMX6; *ltn1*::His3MX6 | This study |
| BY4741 *ltn1**rqc2* | MATa: *his3*1; *leu2*0; *met15*0; *ura3*0; *rqc2*::KanMX6; *ltn1*::His3MX6 | This study |
| BY4742 Ltn1RING-HA | MATα: *his3*Δ1; *leu2*Δ0; *lys2*Δ0; *ura3*Δ0; *ltn1*Δ 4500-3xHA::KanMX6 | Bengtson and Joazeiro, 2010 |
| DS10 *ltn1* | MATa: *trp1**; lys1; lys2; ura3-52; leu2-3,112; his3-11,15; ltn1*::His3MX6 | This study |
| W303 Tet-Sis1 | MATa; *leu2-3,112*; *trp1-1*; *can1-100*; *ura3-1*; *ade2-1*; *his3-11,15*; *sis1*::*LEU2*; pCM184 tetO7-*SIS1* (*TRP1*) | Aron et al., 2007 |
| W303 Tet-Sis1 *ltn1* | MATa; *leu2-3,112*; *trp1-1*; *can1-100*; *ura3-1*; *ade2-1*; *his3-11,15*; *sis1*::*LEU2*; pCM184 tetO7-*SIS1* (*TRP1*) *ltn1*::KanMX6 | This study |
