# Supplementary figures and images for: The cinematic nature of the opening scene of Heliodoros' "Aithiopika"
Source: eLife journal article supplement (doi:10.7554/elife.11794), 2000-01-01

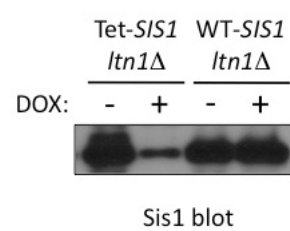

Supplement: supp [file elife-11794-supp-v1.zip]

**A**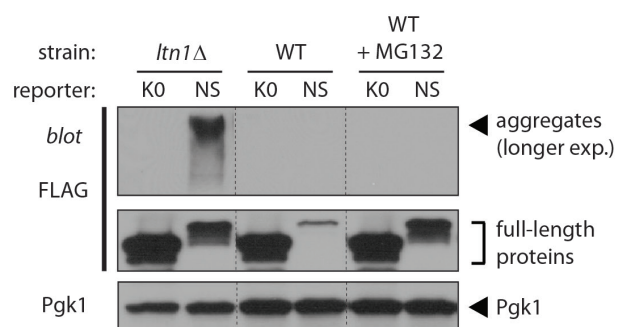**B**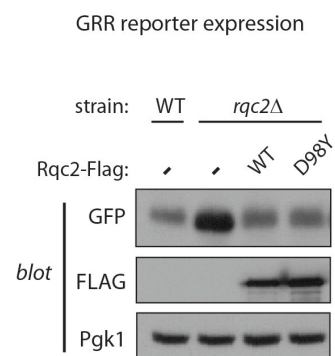**C**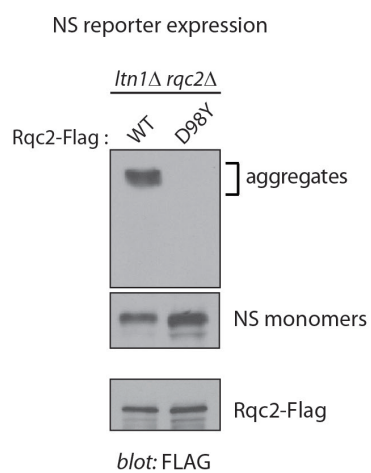**D**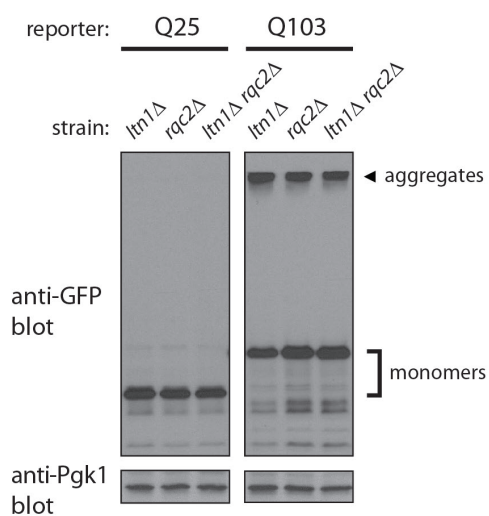**E**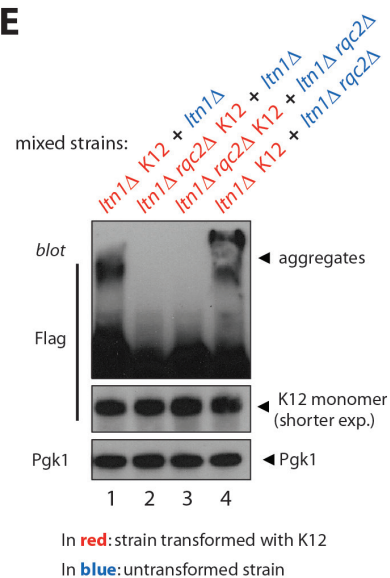

Supplement: supp [file elife-11794-supp-v1.zip]

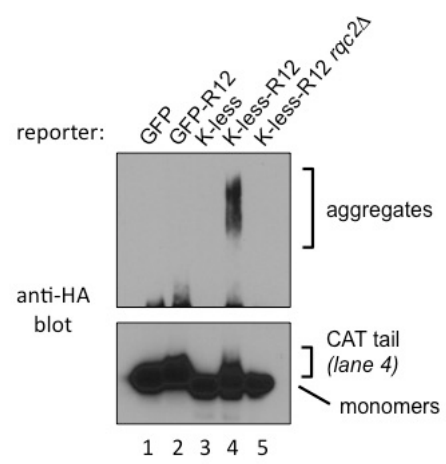

Supplement: supp [file elife-11794-supp-v1.zip]

**A**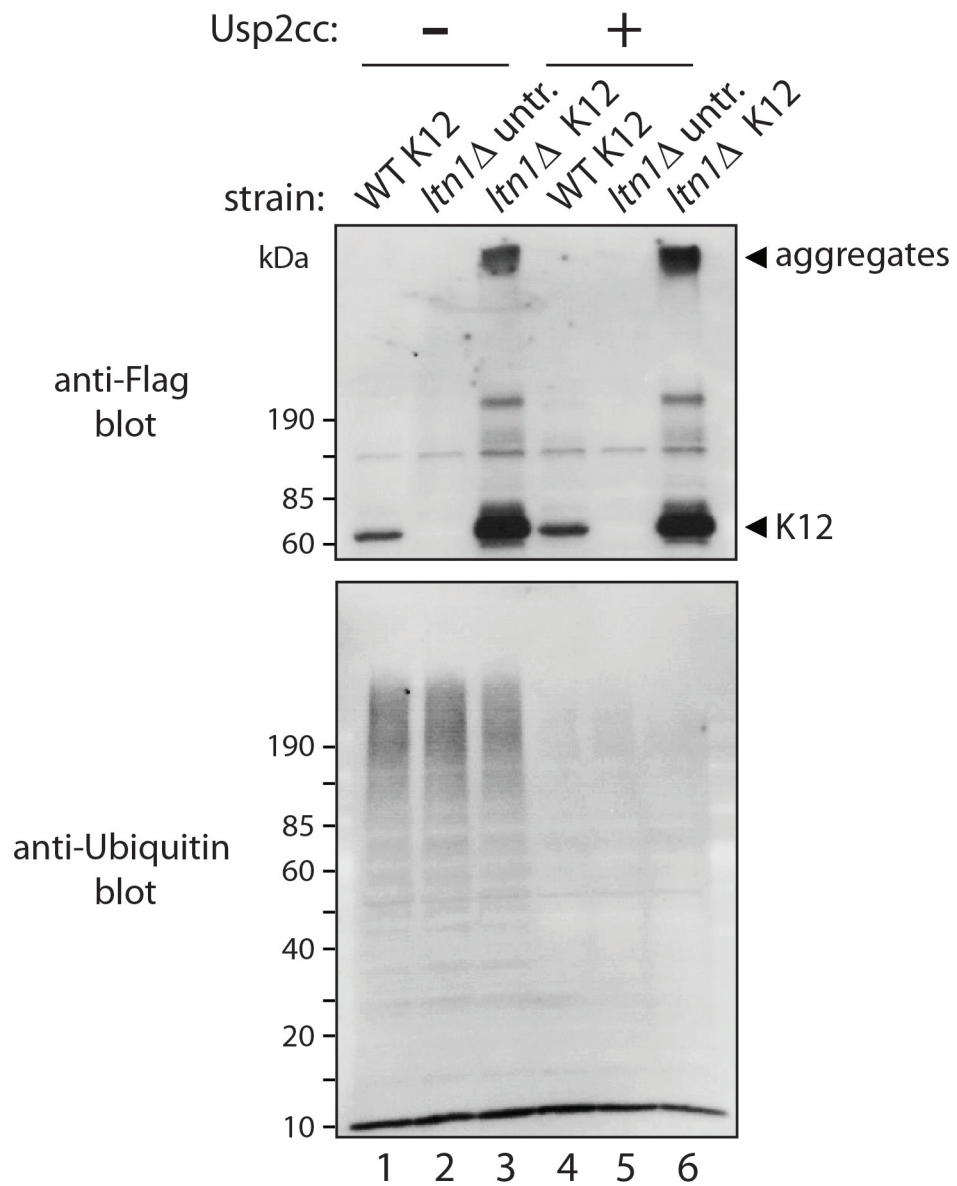**B**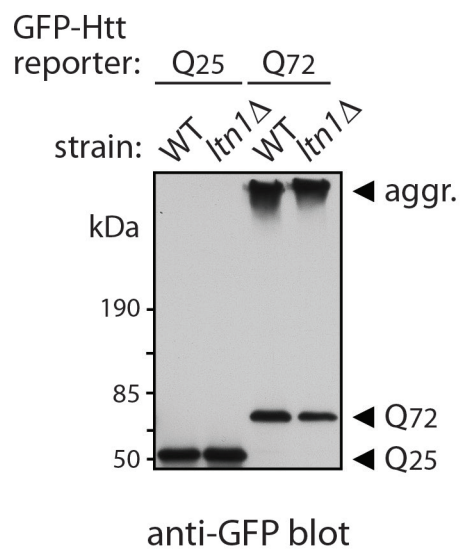

Supplement: supp [file elife-11794-supp-v1.zip]

**A**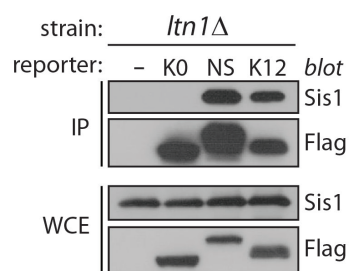**B**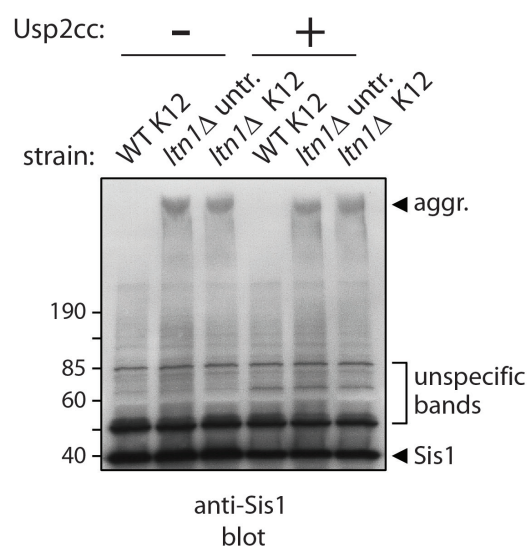**C**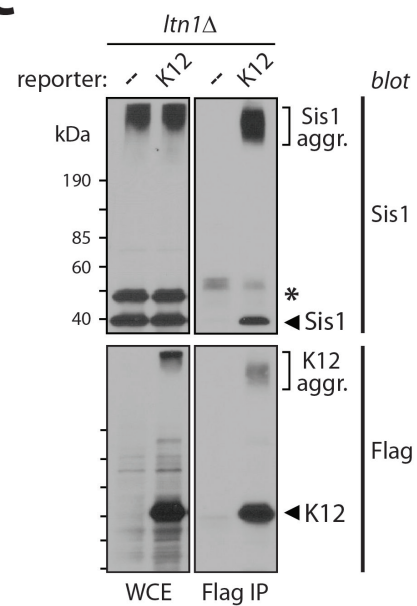

Supplement: supp [file elife-11794-supp-v1.zip]
